# Supplementary material for: Structural basis of ethnic-specific variants of PAX4 associated with type 2 diabetes
Source: PubMed Central journal article supplement (PMC8257626; doi:10.1038/s41439-021-00156-8), 2021-07-05
Supplement: 41439_2021_156_MOESM1_ESM.pdf [file 41439_2021_156_MOESM1_ESM.pdf]

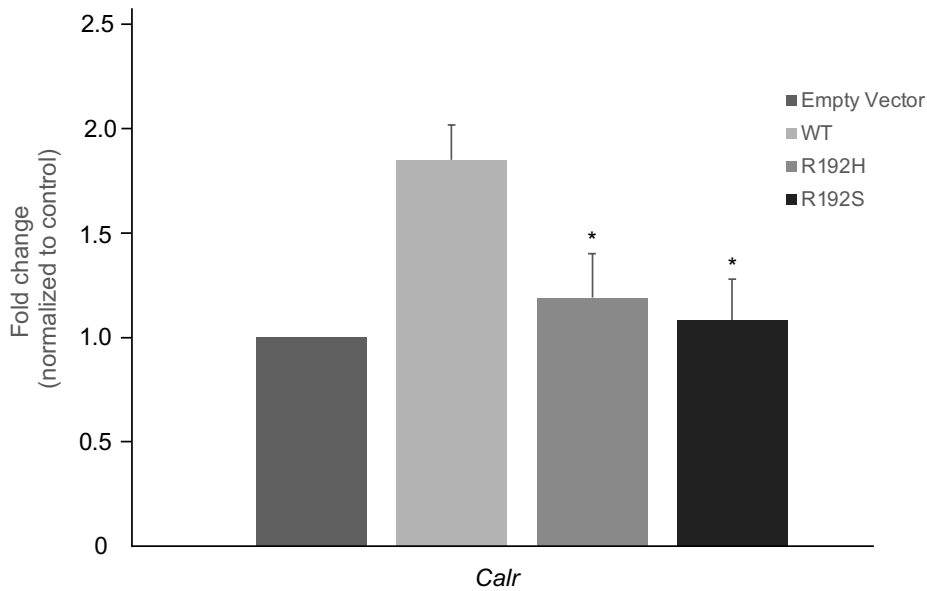

**Supplementary Figure S1.** Assessment of mRNA expression level of *Calr* in cells overexpressing PAX4 wild-type and variants. The *Calr* gene was assessed for its mRNA expression in INS-1 832/13 cells overexpressing PAX4 wild-type and variants using qPCR, with its relative mRNA expression calculated through normalization to the *GAPDH* mRNA level. The fold increase of the mRNA expression in the cells overexpressing PAX4 wild-type and variants compared with that in the cells transfected with empty vector was calculated and was shown as mean  $\pm$  s.e.m. from four independent experiments. \* $P < 0.05$  vs. wild-type.
