# Supplementary material for: Structural basis of ethnic-specific variants of PAX4 associated with type 2 diabetes
Source: PubMed Central journal article supplement (PMC8257626; doi:10.1038/s41439-021-00156-8), 2021-07-05
Supplement: 41439_2021_156_MOESM2_ESM.pdf [file 41439_2021_156_MOESM2_ESM.pdf]

# 1 **Supplementary Information**

## 2 **Structural basis of ethnic-specific variants of PAX4 associated with type 2 diabetes**

3

4 Jun Hosoe<sup>1</sup>, Ken Suzuki<sup>1,2</sup>, Fuyuki Miya<sup>3,4,5</sup>, Takashi Kato<sup>1</sup>, Tatsuhiko Tsunoda<sup>3,4,5,6</sup>, Yukinori  
5 Okada<sup>2</sup>, Momoko Horikoshi<sup>7</sup>, Nobuhiro Shojima<sup>\*1</sup>, Toshimasa Yamauchi<sup>\*1</sup>, Takashi  
6 Kadowaki<sup>\*1,8,9,10</sup>

7

8 1. Department of Diabetes and Metabolic Diseases, Graduate School of Medicine, The  
9 University of Tokyo, Tokyo, Japan

10 2. Department of Statistical Genetics, Osaka University Graduate School of Medicine,  
11 Osaka, Japan

12 3. Department of Medical Science Mathematics, Medical Research Institute, Tokyo  
13 Medical and Dental University, Tokyo, Japan

14 4. Laboratory for Medical Science Mathematics, RIKEN Center for Integrative Medical  
15 Sciences, Yokohama, Japan

16 5. CREST, JST, Tokyo, Japan

17 6. Laboratory for Medical Science Mathematics, Department of Biological Sciences,  
18 Graduate School of Science, The University of Tokyo, Tokyo, Japan

19 7. Laboratory for Genomics of Diabetes and Metabolism, RIKEN Center for Integrative  
20 Medical Sciences, Kanagawa, Japan

21 8. Department of Prevention of Diabetes and Lifestyle-Related Diseases, Graduate School  
22 of Medicine, The University of Tokyo, Tokyo, Japan

23 9. Department of Metabolism and Nutrition, Teikyo University Mizonokuchi Hospital,  
24 Kawasaki, Kanagawa, Japan

25 10. Toranomon Hospital, Tokyo, Japan

26

27 \*Corresponding author:

28 Correspondence should be addressed to Nobuhiro Shojima, Toshimasa Yamauchi, and  
29 Takashi Kadowaki.

30

## 31 **Supplementary Note**

32

### 33 **Building of structural models of two PAX4 mutants (p.Arg192Ser and p.Arg192His)**

34 A 3-dimensional structural model of the human PAX4 homeodomain (amino acid residues  
35 162-220) was constructed by homology modeling with SWISS-MODEL<sup>15</sup>, using the X-ray  
36 crystal structure of human PAX3 (UniProt: P23760) (PDB ID: 3CMY)<sup>16</sup> as a template. Amino  
37 acid identity was 50.85% between the PAX4 and PAX3 homeodomains. When the quality of  
38 the structural model was evaluated by using QMEAN, the QMEAN Z-score of the PAX4  
39 model was -0.55, indicating that the model was reliable<sup>15</sup>. A structural model of the PAX4  
40 homeodomain binding with DNA was built from PAX3 complexed with DNA (PDB ID:  
41 3CMY)<sup>16</sup> by superimposing PAX4 onto PAX3. Superimposition and merging of coordinate  
42 data were performed with Waals (Altif Laboratories, Inc., Tokyo, Japan). Structural models  
43 of two PAX4 mutants (p.Arg192Ser and p.Arg192His) were built by using the mutation and  
44 energy minimization command of Swiss-Pdb Viewer<sup>17</sup>. Comparison between the structural  
45 models of wild-type PAX4 and each mutant was performed with Waals. Coordinate data for  
46 the X-ray crystal structures of the human PAX3 (PDB ID: 3CMY)<sup>16</sup> was obtained from the  
47 Protein Data Bank: PDB (<https://www.rcsb.org>). A sequence of PAX4 (UniProt: O43316) was  
48 obtained from the UniProt database (<https://www.uniprot.org/>).

49

### 50 **Analysis of structural modifications in the PAX4 mutants (p.Arg192Ser and** 51 **p.Arg192His)**

52 T2D GWAS meta-analysis recently performed in a Japanese population showed that a  
53 previously unreported missense variant of PAX4 (p.Arg192Ser) reached genome-wide  
54 significance<sup>4</sup>. Another previously established independent T2D variant of PAX4  
55 (p.Arg192His)<sup>18</sup> located at the same amino acid was reported to be associated with reduced  
56 C-peptide levels in a genetic study of T2D in Korea<sup>19</sup>. It was reported that an *in vitro* study  
57 of the PAX4 p.Arg192His mutant demonstrated impaired repression of the transcription of  
58 target genes involved in maintenance of  $\beta$ -cell function compared with wild-type PAX4<sup>8</sup>. To  
59 investigate the influence of these PAX4 mutations, we constructed 3-dimensional structural  
60 models of the wild-type human PAX4 homeodomain and the two mutants (Arg192Ser and  
61 Arg192His). Then we compared the model of each mutant with that of wild-type PAX4 to  
62 identify structural defects. The homeodomain of PAX4 is a conserved DNA-binding module  
63 that consists of three  $\alpha$ -helices (helix-1, helix-2 and helix-3), and helix-3 of the homeodomain

64 fits into the major groove of DNA (**Fig. 1**). Arg192 is located on the helix-2 and the side chain  
65 of Arg192 forms salt-bridges with Glu203 on the helix-3. The residues Arg192 and Glu203  
66 are conserved in the homeodomain family and are considered to contribute to stability of the  
67 three helices in the homeodomain structure through the formation of salt bridge<sup>16,20,21</sup>. In  
68 addition, Arg192 of PAX4 is thought to bind with the phosphate backbone of double-stranded  
69 DNA (**Fig. 1**). The Arg residue corresponding to Arg192 of PAX4 is considered to be involved  
70 with DNA binding in other members of the homeodomain family<sup>16,21</sup>. Substitution of Arg192  
71 by Ser or His disrupts the formation of the salt-bridges with Glu203 due to loss of the  
72 positively charged arginine side chain (**Fig. 2**), reducing the stability of the homeodomain.  
73 In addition, substitution of Arg192 by Ser or His is predicted to disrupt the direct binding with  
74 the phosphate backbone of double-stranded DNA (**Fig. 2**). In models of the two mutants  
75 (p.Arg192Ser and p.Arg192His) binding to DNA, the distance between the side chain of Ser  
76 or His and the phosphate backbone of DNA was 6.57Å and 6.15Å, respectively, indicating  
77 these residues could not interact with the phosphate backbone of DNA. Accordingly, the  
78 p.Arg192Ser and p.Arg192His variants of PAX4 are deduced to show decreased stability of  
79 the homeodomain containing the helices-2 and -3 involved with DNA binding, as well as loss  
80 of the ability to bind directly to the phosphate backbone of double-stranded DNA. Thus,  
81 these mutations are deduced to affect structural stability of the PAX4 homeodomain and its  
82 binding to DNA. It has been reported that missense mutations of the PAX3 homeodomain  
83 associated with Waardenburg syndrome are predicted to destabilize the homeodomain or  
84 affect DNA binding<sup>16</sup>, in agreement with the structural influence of these two PAX4 variants.

85

## 86 **Cell culture**

87 INS-1 832/13 cells were maintained in RPMI 1640 medium supplemented with 10% heat-  
88 inactivated fetal bovine serum, 10 mM HEPES, 50 µM β-mercaptoethanol, 1 mM sodium  
89 pyruvate, 100 µg/ml streptomycin, and 100 IU/ml penicillin in humidified air containing 5%  
90 CO<sub>2</sub>.

91

## 92 **Quantitative PCR**

93 Total RNA was obtained from INS-1 832/13 cells using the TaqMan Fast Advanced Cells-to-  
94 CT Kit (ThermoFisher SCIENTIFIC) and was reverse-transcribed into cDNA using the  
95 TaqMan Fast Advanced Cells-to-CT Kit (ThermoFisher SCIENTIFIC). cDNA was put into  
96 TaqMan Fast Advanced Master Mix (ThermoFisher SCIENTIFIC) containing TaqMan Gene

97 expression Assays (ThermoFisher SCIENTIFIC). The relative mRNA expression was  
98 calculated through normalization to the GAPDH mRNA level, according to the  $2^{-\Delta\Delta Ct}$   
99 method<sup>22</sup>. Experiments were repeated four times independently.

100

### 101 **Statistical Analysis**

102 The fold increase of the mRNA expression in the cells overexpressing PAX4 wild-type and  
103 variants compared with that in the cells transfected with empty vector was shown as mean  
104  $\pm$  s.e.m. The Student's t-test was used for statistical analyses, assuming equal variance,  
105 and p-values were calculated based on the 2-tailed test. Differences were statistically  
106 significant when the calculated p-value was less than 0.05.

107

### 108 **References**

- 109 15. Waterhouse, A. et al. SWISS-MODEL: homology modelling of protein structures  
110 and complexes. *Nucleic Acids Res.* **46**, W296-W303 (2018).
- 111 16. Birrane, G., Soni, A., & Ladas, J. A. Structural basis for DNA recognition by the  
112 human PAX3 homeodomain. *Biochemistry* **48**, 1148-1155 (2009).
- 113 17. Guex, N., & Peitsch, M. C. SWISS-MODEL and the Swiss-PdbViewer: an  
114 environment for comparative protein modeling. *Electrophoresis* **18**, 2714-2723 (1997).
- 115 18. Fuchsberger, C. et al. The genetic architecture of type 2 diabetes. *Nature* **536**, 41-  
116 47 (2016).
- 117 19. Kwak, S. H. et al. Nonsynonymous Variants in PAX4 and GLP1R Are Associated  
118 With Type 2 Diabetes in an East Asian Population. *Diabetes* **67**, 1892-1902 (2018).
- 119 20. Torrado, M. et al. Role of conserved salt bridges in homeodomain stability and DNA  
120 binding. *J. Biol. Chem.* **284**, 23765-23779 (2009).
- 121 21. Miyazono, K. et al. Cooperative DNA-binding and sequence-recognition  
122 mechanism of aristaless and clawless. *EMBO J.* **29**, 1613-1623 (2010).
- 123 22. Livak, K. J., & Schmittgen, T. D. Analysis of relative gene expression data using  
124 real-time quantitative PCR and the  $2^{-(\Delta\Delta C(T))}$  Method. *Methods* **25**, 402-408  
125 (2001).

Supplementary Table 1. Variants of genes involved in the MODY pathways associated with T2D in the Japanese population.

| LOCUS*                | rsID †      | CHR | POS         | RA | OA | Japanese           |                  |                   |           | European §         |                  |                   |           | MAF in 1000 Genomes Phase 3 |       |        |
|-----------------------|-------------|-----|-------------|----|----|--------------------|------------------|-------------------|-----------|--------------------|------------------|-------------------|-----------|-----------------------------|-------|--------|
|                       |             |     |             |    |    | MAF <sub>JPN</sub> | P <sub>JPN</sub> | OR <sub>JPN</sub> | 95%CI     | MAF <sub>EUR</sub> | P <sub>EUR</sub> | OR <sub>EUR</sub> | 95%CI     | EAS                         | JPT   | EUR    |
| <i>AGPAT9/NKX6-1</i>  | rs201597274 | 4   | 85,301,870  | T  | C  | 0.044              | 2.1E-12          | 1.17              | 1.12-1.23 | ND                 | ND               | ND                | ND        | 0.020                       | 0.034 | 0.0070 |
| <i>GCK</i>            | rs2908279   | 7   | 44,174,857  | G  | T  | 0.40               | 5.3E-12          | 1.07              | 1.05-1.09 | 0.50               | 1.1E-07          | 1.03              | 1.02-1.05 | 0.37                        | 0.40  | 0.49   |
| <i>PAX4</i>           | rs2233580   | 7   | 127,253,550 | T  | C  | 0.092              | 4.1E-74          | 1.32              | 1.28-1.36 | 0.00050            | 2.9E-01          | 1.62              | 0.66-3.97 | 0.098                       | 0.11  | 0      |
| <i>MNX1</i>           | rs1182389   | 7   | 157,038,803 | G  | A  | 0.46               | 1.1E-08          | 1.05              | 1.03-1.07 | 0.36               | 1.7E-11          | 1.05              | 1.03-1.06 | 0.47                        | 0.47  | 0.37   |
| <i>HHEX/IDE</i>       | rs12219514  | 10  | 94,466,439  | A  | G  | 0.13               | 4.8E-39          | 1.18              | 1.15-1.21 | 0.44               | 4.6E-61          | 1.12              | 1.10-1.13 | 0.13                        | 0.13  | 0.44   |
| <i>INS-IGF2_KCNQ1</i> | rs2237897 ‡ | 11  | 2,858,546   | C  | T  | 0.38               | 2.6E-168         | 1.30              | 1.27-1.32 | 0.046              | 1.8E-31          | 1.21              | 1.17-1.25 | 0.35                        | 0.39  | 0.047  |
| <i>HNF1A</i>          | rs187150787 | 12  | 121,327,809 | A  | G  | 0.037              | 6.0E-12          | 1.20              | 1.14-1.27 | ND                 | ND               | ND                | ND        | 0.020                       | 0.024 | 0      |
| <i>HNF1B</i>          | rs11651052  | 17  | 36,102,381  | A  | G  | 0.32               | 2.2E-34          | 1.12              | 1.10-1.14 | 0.47               | 8.9E-29          | 1.07              | 1.06-1.09 | 0.25                        | 0.33  | 0.47   |
| <i>HNF4A</i>          | rs16988991  | 20  | 42,989,777  | A  | G  | 0.45               | 3.8E-09          | 1.05              | 1.04-1.07 | 0.16               | 5.8E-09          | 1.05              | 1.03-1.07 | 0.42                        | 0.40  | 0.16   |

CHR, chromosome; POS, position in Human Genome version 19 (hg19), build 37; RA, risk allele; OR, other allele; MAF, minor allele frequency; OR, odds ratio; CI, confidence interval.

\* Based on locus information reported by Suzuki et al. (*Nat. Genet.* 2019)<sup>4</sup>

† Variants at primary signals<sup>4</sup> without adjustment for BMI are shown. Information on the same variants from GWAS meta-analysis in a European population<sup>3</sup> without adjustment for BMI is also shown.

‡ The variant rs2237897 is located within 1 Mb of the lead independent variant rs4929965 at the *INS/IGF2* locus in Europeans<sup>3</sup>, which is also associated with T2D in Japanese<sup>4</sup> (see Supplementary Table 2).

§ Based on summary statistics reported by Mahajan et al. (*Nat. Genet.* 2018)<sup>3</sup>

Supplementary Table 2. Variants of genes involved in the MODY pathway associated with T2D in Europeans.

| LOCUS*          | rsID †     | CHR | POS         | RA | OA | European           |                  |                   |           | Japanese ‡         |                  |                   |           | MAF in 1000 Genomes Phase 3 |        |       |
|-----------------|------------|-----|-------------|----|----|--------------------|------------------|-------------------|-----------|--------------------|------------------|-------------------|-----------|-----------------------------|--------|-------|
|                 |            |     |             |    |    | MAF <sub>EUR</sub> | P <sub>EUR</sub> | OR <sub>EUR</sub> | 95%CI     | MAF <sub>JPN</sub> | P <sub>JPN</sub> | OR <sub>JPN</sub> | 95%CI     | EAS                         | JPT    | EUR   |
| <i>SLC2A2</i>   | rs9873618  | 3   | 170,733,076 | G  | A  | 0.29               | 4.8E-21          | 1.07              | 1.05-1.08 | 0.20               | 1.0E-02          | 1.03              | 1.01-1.05 | 0.21                        | 0.25   | 0.29  |
| <i>GCK</i>      | rs878521   | 7   | 44,255,643  | A  | G  | 0.25               | 1.9E-13          | 1.06              | 1.04-1.07 | 0.41               | 2.1E-02          | 1.02              | 1.00-1.04 | 0.35                        | 0.36   | 0.25  |
| <i>MNX1</i>     | rs6459733  | 7   | 156,930,550 | G  | C  | 0.33               | 2.4E-17          | 1.06              | 1.05-1.07 | 0.46               | 2.7E-07          | 1.05              | 1.03-1.07 | 0.45                        | 0.44   | 0.36  |
| <i>NEUROG3</i>  | rs2642588  | 10  | 71,466,578  | G  | T  | 0.30               | 2.2E-14          | 1.05              | 1.04-1.07 | 0.082              | 1.9E-01          | 1.02              | 0.99-1.06 | 0.13                        | 0.077  | 0.30  |
| <i>HHEX/IDE</i> | rs10882101 | 10  | 94,462,427  | T  | C  | 0.41               | 1.4E-08          | 1.06              | 1.04-1.08 | 0.29               | 1.2E-35          | 1.13              | 1.10-1.15 | 0.28                        | 0.33   | 0.43  |
| <i>INS/IGF2</i> | rs4929965  | 11  | 2,197,286   | A  | G  | 0.38               | 4.0E-26          | 1.07              | 1.06-1.09 | 0.081              | 3.1E-13          | 1.12              | 1.09-1.16 | 0.087                       | 0.067  | 0.36  |
| <i>HNF1A</i>    | rs56348580 | 12  | 121,432,117 | G  | C  | 0.31               | 2.3E-13          | 1.05              | 1.04-1.07 | ND                 | ND               | ND                | 0.0050    | 0                           | 0.30   |       |
| <i>ONECUT1</i>  | rs2456530  | 15  | 53,091,553  | T  | C  | 0.13               | 5.4E-09          | 1.06              | 1.04-1.08 | 0.49               | 1.3E-02          | 1.02              | 1.00-1.04 | 0.50                        | 0.46   | 0.11  |
| <i>HNF1B</i>    | rs10908278 | 17  | 36,099,952  | T  | A  | 0.48               | 6.4E-36          | 1.08              | 1.07-1.10 | 0.31               | 6.7E-32          | 1.13              | 1.10-1.15 | 0.23                        | 0.32   | 0.48  |
| <i>NKX2.2</i>   | rs13041756 | 20  | 21,466,795  | C  | T  | 0.11               | 1.4E-08          | 1.06              | 1.04-1.08 | 0.20               | 8.8E-01          | 1.00              | 0.98-1.02 | 0.21                        | 0.23   | 0.10  |
| <i>HNF4A</i>    | rs1800961  | 20  | 43,042,364  | T  | C  | 0.035              | 2.3E-22          | 1.18              | 1.15-1.23 | 0.010              | 7.7E-05          | 1.18              | 1.09-1.29 | 0.016                       | 0.0048 | 0.037 |

CHR, chromosome; POS, position in Human Genome version 19 (hg19), build 37; RA, risk allele; OR, other allele; MAF, minor allele frequency; OR, odds ratio; CI, confidence interval.

\* Based on locus information reported by Mahajan et al. (*Nat. Genet.* 2018)<sup>3</sup>

† Variants at primary signals<sup>3</sup> without adjustment for BMI are shown. Information on the same variants from GWAS meta-analysis in a Japanese population<sup>4</sup> without adjustment for BMI is also shown.

‡ Based on summary statistics reported by Suzuki et al. (*Nat. Genet.* 2019)<sup>4</sup>

Supplementary Table 3. Annotation of missense variants in *PAX4* with prediction tools.

| Variant   | Chr | Pos         | Gene        | Amino acid change | RA | OA | MAF in 1KGP |       |       | SIFT_pred   | Polyphen2_HDIV_pred | PROVEAN_pred | MetaLR_pred | FATHMM_pred |
|-----------|-----|-------------|-------------|-------------------|----|----|-------------|-------|-------|-------------|---------------------|--------------|-------------|-------------|
|           |     |             |             |                   |    |    | EAS         | JPT   | EUR   |             |                     |              |             |             |
| rs2233580 | 7   | 127,253,550 | <i>PAX4</i> | p.R192H           | T  | C  | 0.098       | 0.11  | 0.000 | Deleterious | Probably damaging   | Deleterious  | Deleterious | Deleterious |
| rs3824004 | 7   | 127,253,551 | <i>PAX4</i> | p.R192S           | T  | G  | 0.023       | 0.038 | 0.000 | Deleterious | Probably damaging   | Deleterious  | Deleterious | Deleterious |

CHR, chromosome; POS, position in Human Genome version 19 (hg19), build 37; RA, risk allele; OR, other allele; MAF, minor allele frequency.
